# Supplementary material for: Protective Effects of Dipterocarpus tuberculatus in Blue Light-Induced Macular Degeneration in A2E-Laden ARPE19 Cells and Retina of Balb/c Mice
Source: MDPI journal article supplement (doi:10.3390/antiox12020329), 2023-01-31

**Table S1. List of antibodies for western blot analyses**

| Name                          | Catalog   | Company, Location, Nation         |
|-------------------------------|-----------|-----------------------------------|
| Anti-Bax antibody             | 2772s     | Cell Signaling, Danvers, MA, USA  |
| Anti-Bcl-2 antibody           | PAS-20068 | Thermo Fisher Scientific, MA, USA |
| Anti-Cas-3 antibody           | 9662s     | Cell Signaling, Danvers, MA, USA  |
| Anti-Nrf2 antibody            | Ab137550  | Abcam, Cambridge, UK              |
| Anti-SOD antibody             | Ab13498   | Abcam, Cambridge, UK              |
| Anti-MMP2 antibody            | 40994s    | Cell Signaling, Danvers, MA, USA  |
| Anti-MMP9 antibody            | 2270s     | Cell Signaling, Danvers, MA, USA  |
| Anti-iNOS antibody            | 13120s    | Cell Signaling, Danvers, MA, USA  |
| Anti-COX-2 antibody           | 12282s    | Cell Signaling, Danvers, MA, USA  |
| Anti-ASC antibody             | 67814s    | Cell Signaling, Danvers, MA, USA  |
| Anti-Cas-1 antibody           | 24232s    | Cell Signaling, Danvers, MA, USA  |
| Anti-Cleaved Cas-1 antibody   | 24232s    | Cell Signaling, Danvers, MA, USA  |
| Anti-NLRP3 antibody           | 15101s    | Cell Signaling, Danvers, MA, USA  |
| Anti- $\beta$ -actin antibody | 4967s     | Cell Signaling, Danvers, MA, USA  |

**Table S2. Primer sequences for RT-PCR analysis**

| Primer name    | Accession number | Sequence (from 5' to 3')          | Product size (bp) |
|----------------|------------------|-----------------------------------|-------------------|
| TNF- $\alpha$  | AY423855.1       |                                   |                   |
| Forward        |                  | CCTGT AGCCC ACGTC GTAGC           | 70                |
| Reverse        |                  | TTGAC CTCAG CGCTG ACTTG           |                   |
| IL-6           | NM_012589.2      |                                   |                   |
| Forward        |                  | TTGGG ACTGA TGTTG TTGAC A         | 200               |
| Reverse        |                  | TCATC GCTGT TGATA CAATC AGA       |                   |
| IL-1 $\beta$   | NM_008361.4      |                                   |                   |
| Forward        |                  | CTACA GGCTC CGAGA TGAAC AAC       | 79                |
| Reverse        |                  | CTACA GGCTC CGAGA TGAAC AAC       |                   |
| NF- $\kappa$ B | NM_001382627.1   |                                   |                   |
| Forward        |                  | GTGAGGTCACCTCTAACGTATGCAACAGG     | 361               |
| Reverse        |                  | CTCCACCACATCTTCCTGCTTAGTG         |                   |
| $\beta$ -actin | NM_007393.5      |                                   | 349               |
| Forward        |                  | TGG AAT CCT GTG GCA TCC ATG AAA C |                   |
| Reverse        |                  | TAA AAC GCA GCT CAG TAA CAG TCC G |                   |

**Table S3. Antibodies list for Western blot analyses**

| Name                     | Cat. No.  | Company                           |
|--------------------------|-----------|-----------------------------------|
| Anti-HSL                 | 4107s     | Cell Signaling, Danvers, MA, USA  |
| Anti-p-HSL               | PA5-64494 | Thermo Fisher Scientific, MA, USA |
| Anti-ACADs               | PA5-54580 | Thermo Fisher Scientific, MA, USA |
| Anti-ACO1                | PA5-41753 | Thermo Fisher Scientific, MA, USA |
| Anti-ATP Citrate Lyase   | #4332s    | Cell Signaling, Danvers, MA, USA  |
| Anti-p-ATP Citrate Lyase | #4331s    | Cell Signaling, Danvers, MA, USA  |
| Anti-PPAR $\alpha$       | Ab215270  | Abcam, Cambridge, UK              |
| Anti-p-PPAR $\alpha$     | PA1-820   | Thermo Fisher Scientific, MA, USA |
| Anti- $\beta$ actin      | 87809     | Cell Signaling, Danvers, MA, USA  |

**Supplement Figure S1.** LC-MS analysis of MED and A2E. (A) Seven active components including gallic acid, bergenin, ellagic acid,  $\epsilon$ -viniferin, asiatic acid, oleanolic acid, and 2 $\alpha$ -hydroxyursolic acid were detected as each different peak in chromatogram. (B) Purity of A2E was confirmed using the gradient HPLC method with a YMC-Triart C18 column. Abbreviations: UV, ultraviolet; A2E, N-retinylidene-N-retinylethanolamin.

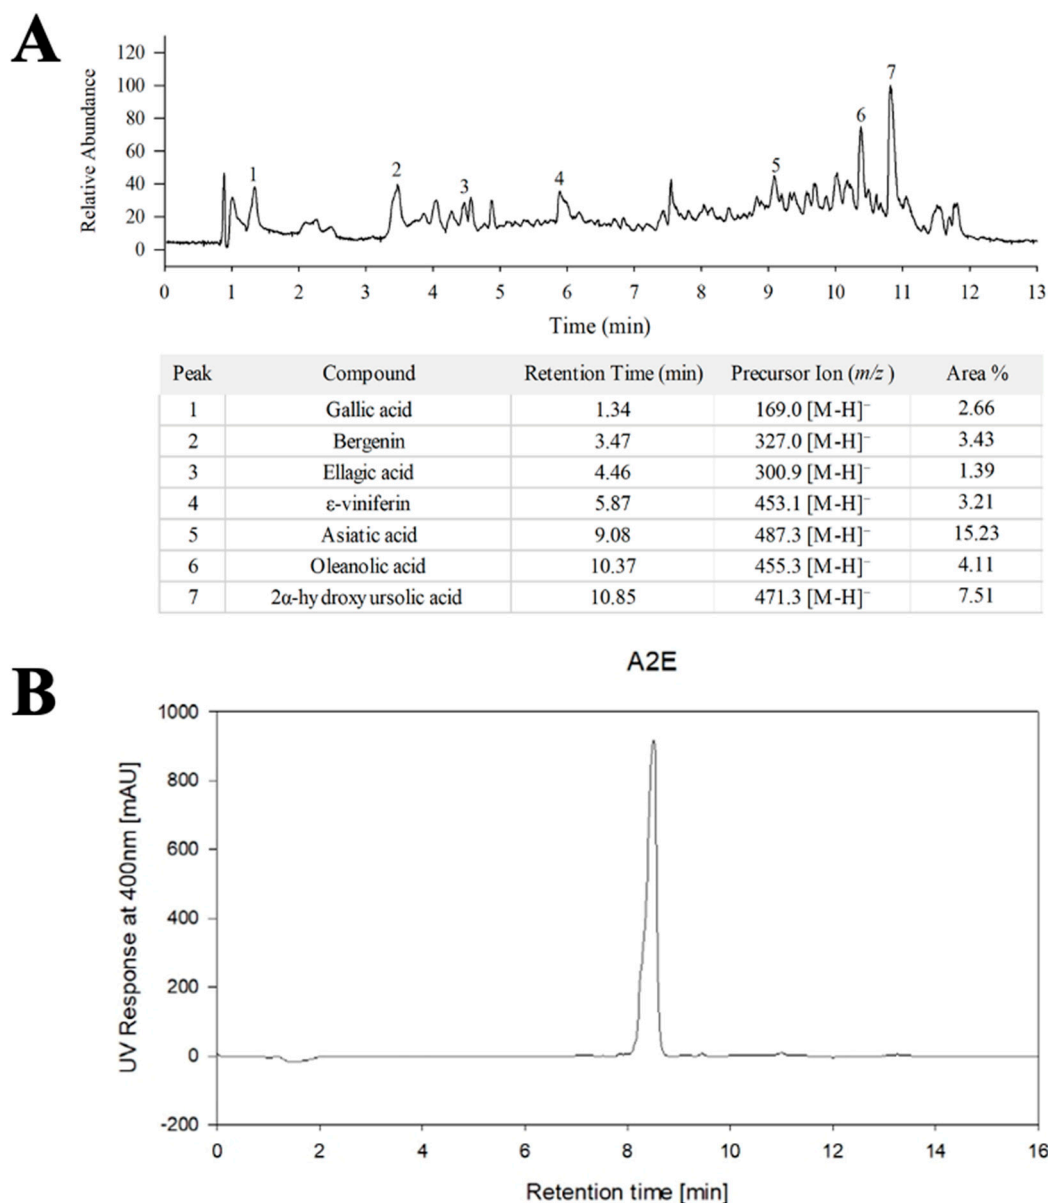

**Supplement Figure S2.** Determination of optimal concentration of MED. (A) After treating various dose (50, 100, 200 and 400  $\mu$ M) of MED for 24 h, the viability of ARPE19 cells were detected using MTT assay. (B) These cells were observed using a inverted microscope at 200 $\times$  magnification. Three to five wells per group were used for MTT assay, and the optical density were repeated for three times. Data represent the mean  $\pm$  SD of triplicates. \*,  $p < 0.05$  relative to the Non treated group. Abbreviations: MED, methanol extracts of *D. tuberculatus*.

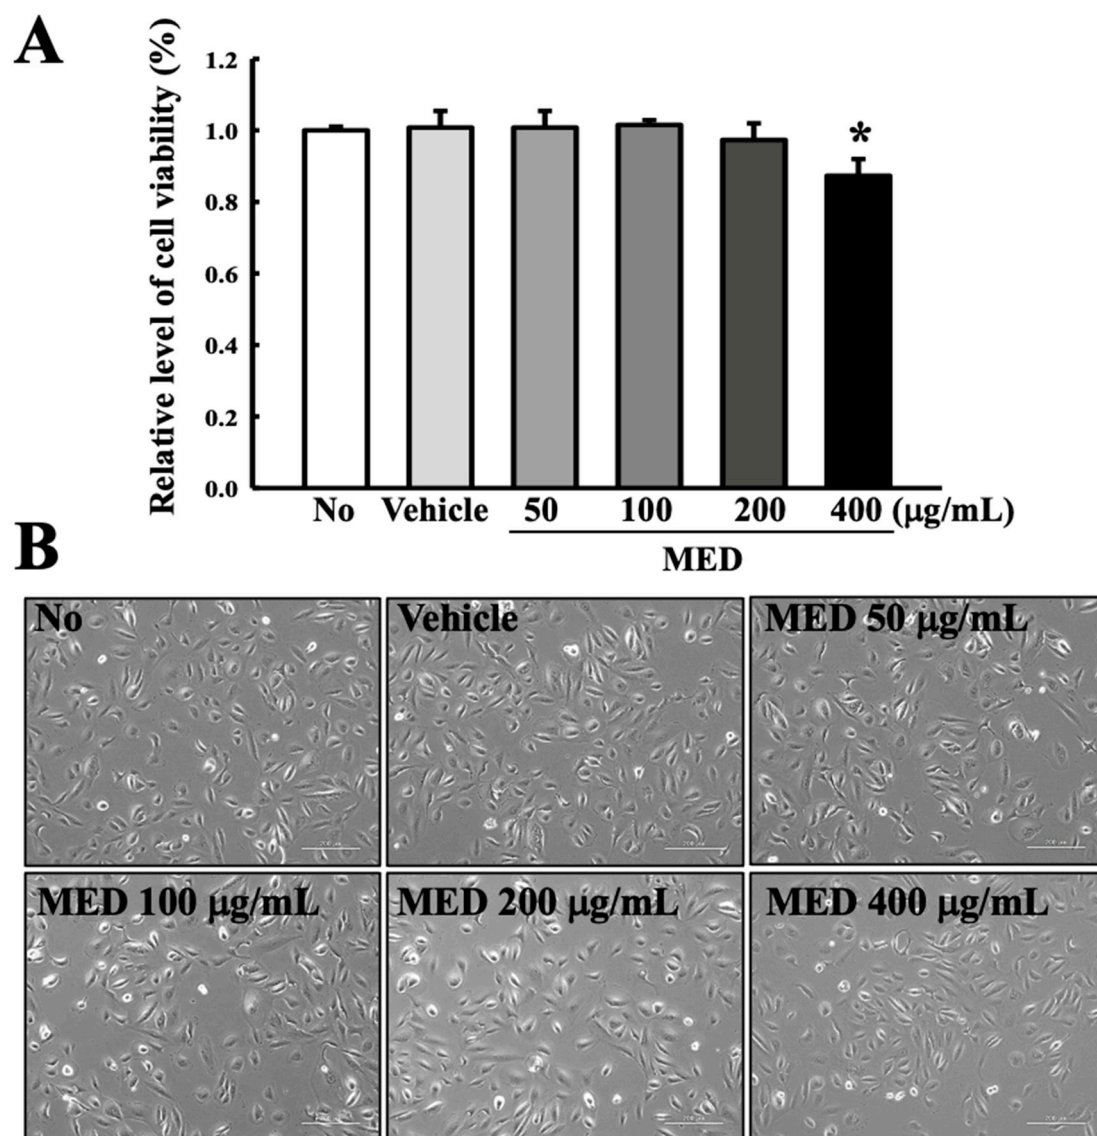

**Supplement Figure S3.** Determination of optimal concentration of A2E and BL. (A) After treating various concentrations of A2E (5, 10, 20, 40, and 80  $\mu$ M) for 24 h and irradiated with BL (450 nm, 2,000 lux), the viability of ARPE19 cells were detected using MTT assay. (B) These cells were observed using a inverted microscope at 200 $\times$  magnification. Three to five wells per group were used for MTT assay, and the optical density were repeated for three times. Data represent the mean  $\pm$  SD of triplicates. \*,  $p < 0.05$  relative to the Non treated group. Abbreviations: A2E: N-retinylidene-N-retinylethanolamine; BL, Blue light.

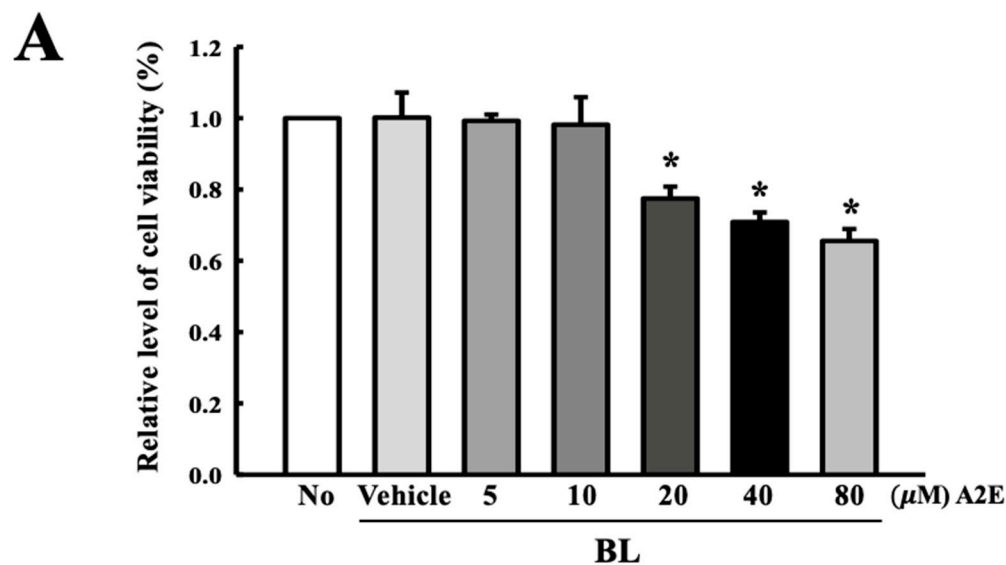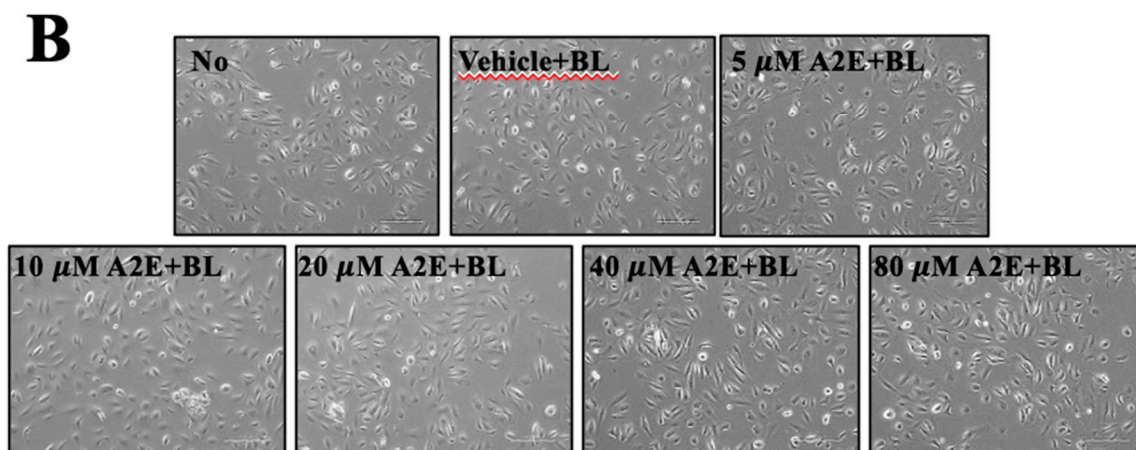

Supplement: s1 [file s1]
